# Supplementary material
Source: PubMed Central journal article supplement (PMC1820688)

# A Distribution of Systolic and Diastolic Intervals in Individual Flies

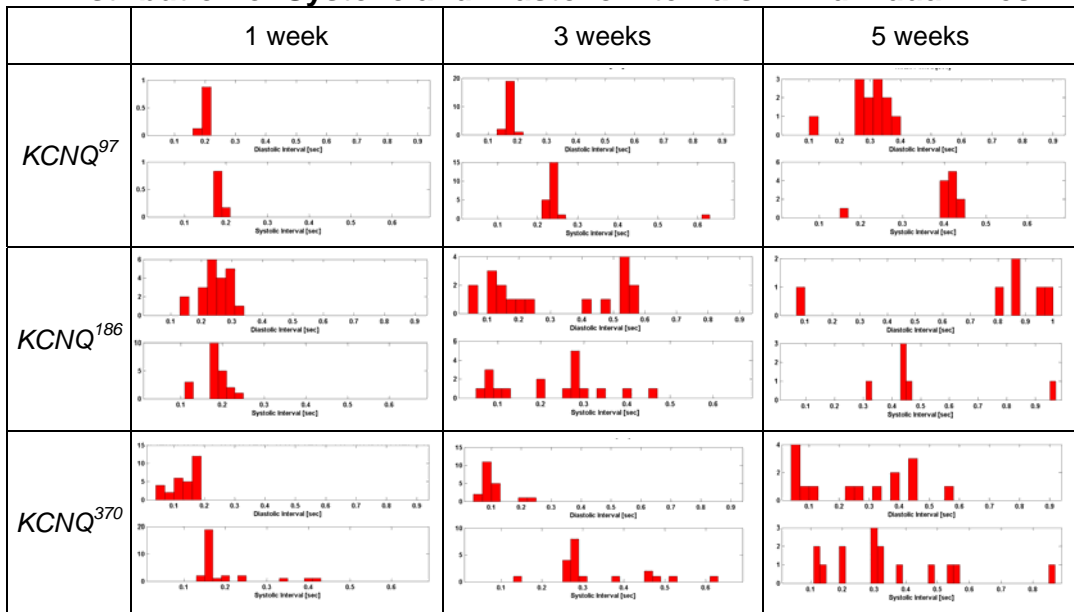

# B

## Combined Heart Periodicity

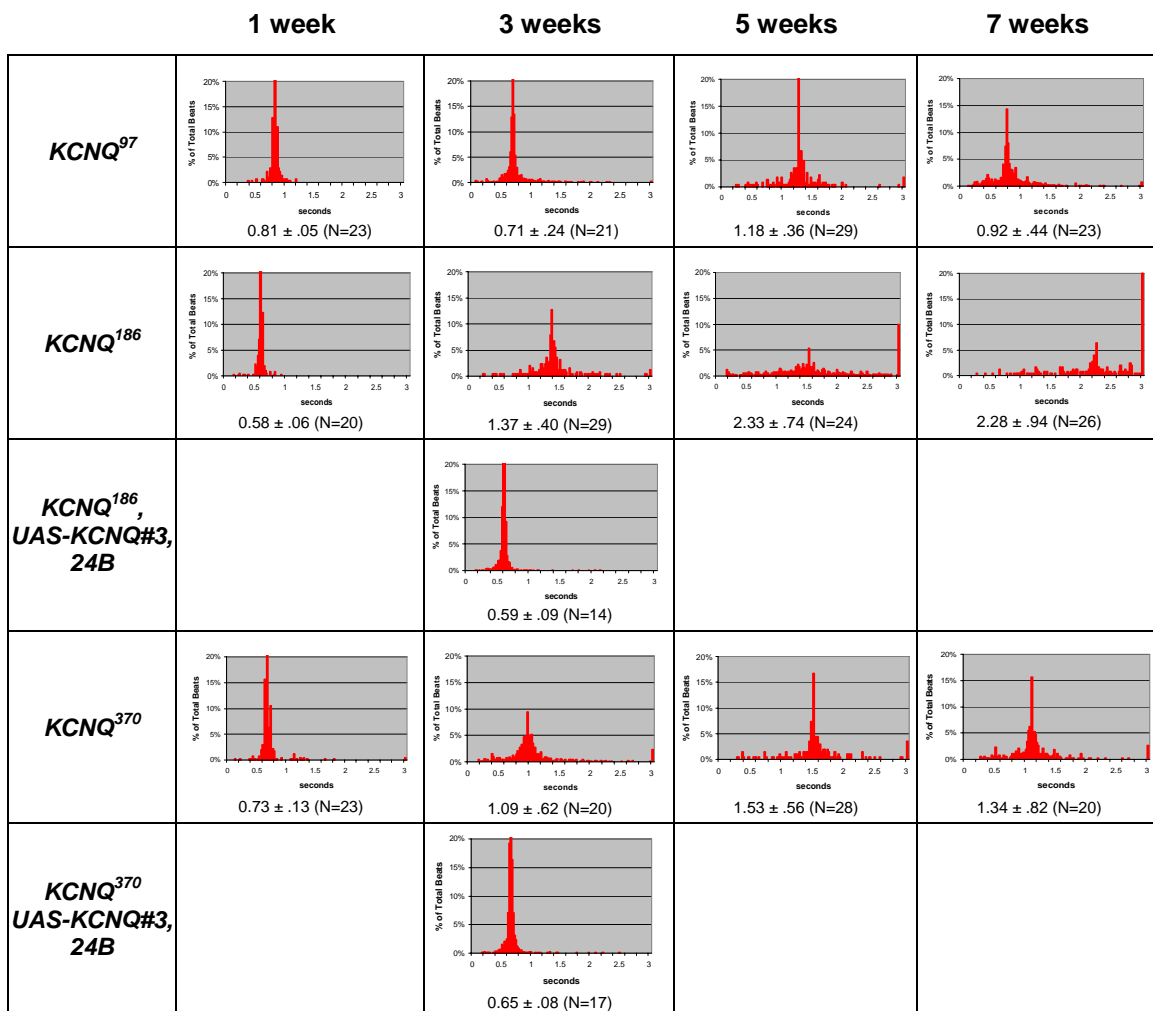

Supplement: pnas_0609278104_3.pdf [file pnas_0609278104_3.pdf]
