# Supplementary material
Source: PubMed Central journal article supplement (PMC1820688)

# Distribution and Quantification of *Drosophila* *KCNQ* gene

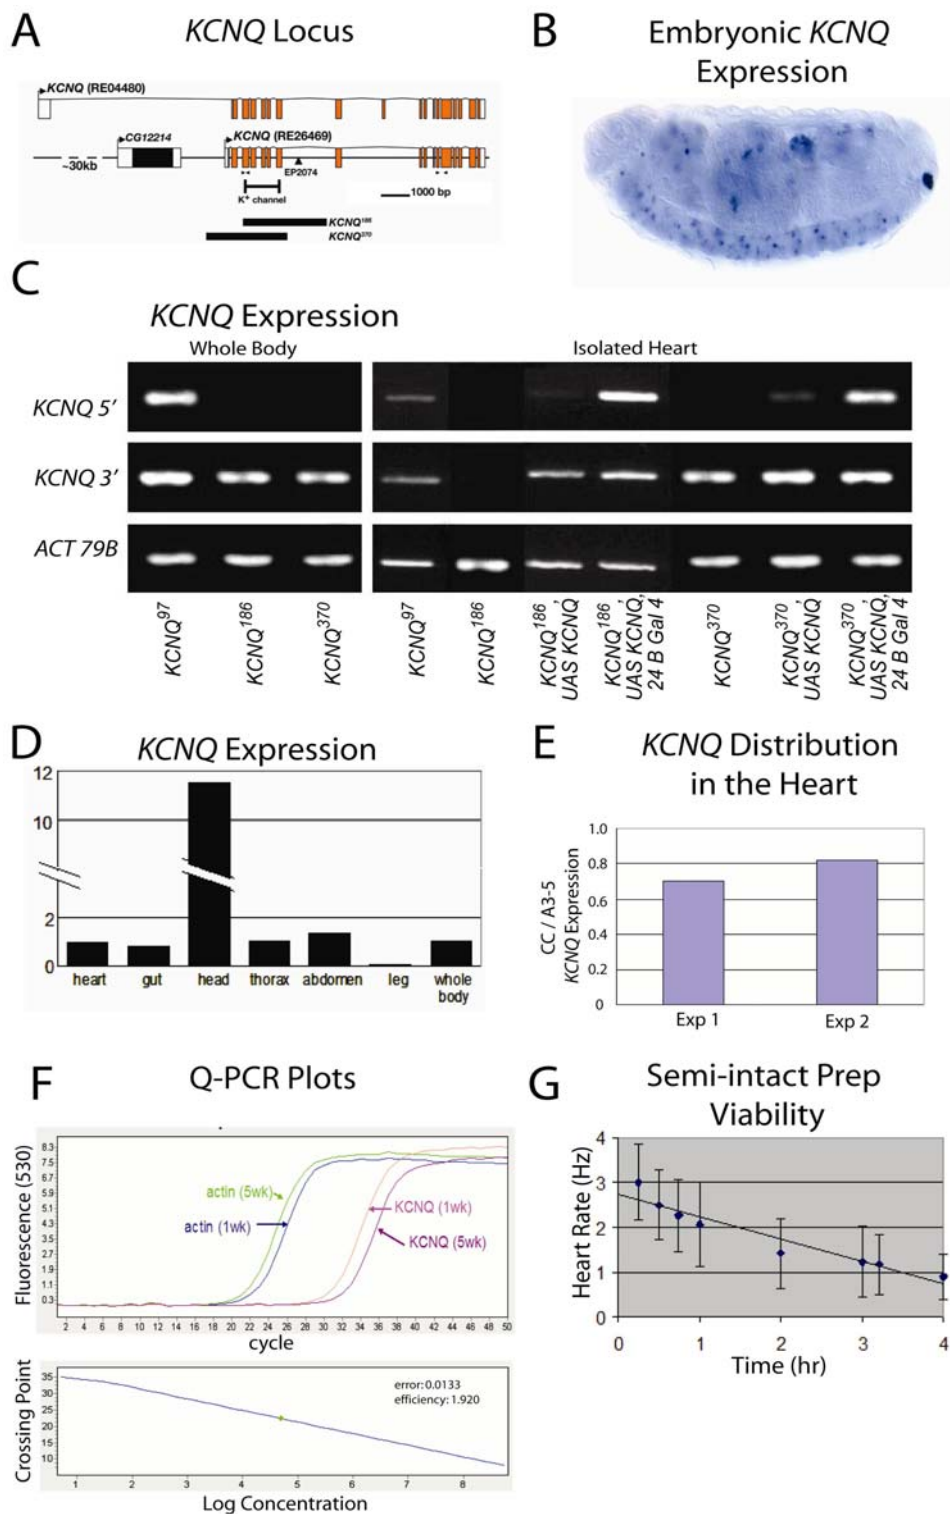

Supplement: pnas_0609278104_1.pdf [file pnas_0609278104_1.pdf]

# A Diastolic Interval

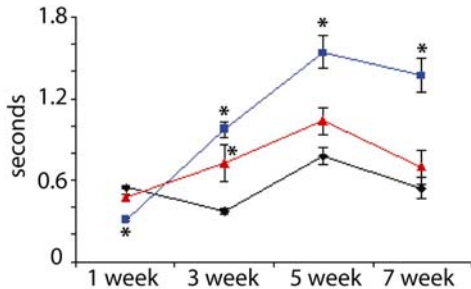

# B Flies Showing Asystole

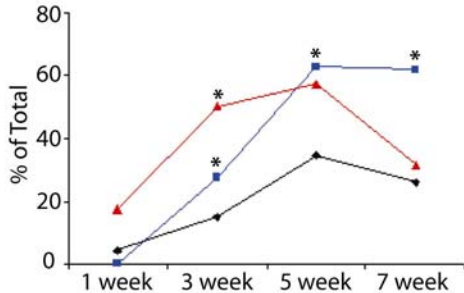

Supplement: pnas_0609278104_2.pdf [file pnas_0609278104_2.pdf]
